# Supplementary material
Source: PubMed Central journal article supplement (PMC2831535)
Supplement: NIHMS161271-supplement-1.pdf [file NIHMS161271-supplement-1.pdf]

**List of participating centers:**

Data collected at participating sites of the NICHD Neonatal Research Network (NRN) were transmitted to RTI International, the data coordinating center (DCC) for the network, which stored, managed and analyzed the data for this study. On behalf of the NRN, Drs. Abhik Das (DCC Principal Investigator) and Scott McDonald (DCC Statistician) had full access to all the data in the study and take responsibility for the integrity of the data and accuracy of the data analysis.

The following investigators, in addition to those listed as authors, participated in this study:

NRN Steering Committee Chair: Alan Jobe, MD PhD, University of Cincinnati.

Brown University Women & Infants Hospital of Rhode Island (U10 HD27904) – William Oh, MD; Lewis P. Rubin, MD; Angelita Hensman, BSN RNC.

Case Western Reserve University Rainbow Babies & Children's Hospital (GCRC M01 RR80, U10 HD21364) – Avroy A. Fanaroff, MD; Michele C. Walsh, MD MS; Nancy S. Newman, BA RN.

Centers for Disease Control and Prevention (IAA Y1-HD-5000-01) – Diana Schendel, PhD.

Duke University University Hospital, Alamance Regional Medical Center, and Durham Regional Hospital (GCRC M01 RR30, U10 HD40492) – Ronald N. Goldberg, MD; C. Michael Cotten, MD MHS; Kathy J. Auten, BS.

Emory University Children's Healthcare of Atlanta, Grady Memorial Hospital, and Emory Crawford Long Hospital (GCRC M01 RR39, U10 HD27851) – Ellen C. Hale, RN BS.

Indiana University Indiana University Hospital, Methodist Hospital, Riley Hospital for Children, and Wishard Health Services (GCRC M01 RR750, U10 HD27856) – James A. Lemons, MD; Brenda B. Poindexter, MD MS; Diana D. Appel, RN BSN; Dianne Herron, RN; Leslie D. Wilson, RN BSN.

Eunice Kennedy Shriver National Institute of Child Health and Human Development – Linda L. Wright, MD; Sumner J. Yaffe, MD; Elizabeth M. McClure, MEd.

RTI International (U01 HD36790) – W. Kenneth Poole, PhD; Betty Hastings; Kristin Zaterka-Baxter, RN; Jeanette O'Donnell Auman, BS.

Stanford University Lucile Packard Children's Hospital (GCRC M01 RR70, U10 HD27880) – David K. Stevenson, MD; Krisa P. Van Meurs, MD; M. Bethany Ball, BS CCRC.

University of Aarhus Department of Epidemiology and Social Medicine, Denmark – Poul Thorsen, MD.

University of Alabama at Birmingham Health System and Children’s Hospital of Alabama (GCRC M01 RR32, U10 HD34216) – Namasivayam Ambalavanan, MD; Monica V. Collins, RN BSN MaEd; Shirley S. Cosby, RN BSN.

University of California – San Diego Medical Center and Sharp Mary Birch Hospital for Women (U10 HD40461) – Neil N. Finer, MD; Maynard R. Rasmussen, MD; David Kaegi, MD; Kathy Arnell, RN; Clarence Demetrio, RN; Wade Rich, BSHS RRT.

University of Cincinnati University Hospital, Cincinnati Children's Hospital Medical Center, and Good Samaritan Hospital (GCRC M01 RR8084, U10 HD27853) – Edward F. Donovan, MD; Vivek Narendran MD MRCP; Barb Alexander, RN; Cathy Grisby, BSN CCRC; Marcia Mersmann, RN; Holly Mincey, RN BSN; Jody Shively, RN.

University of Miami Holtz Children's Hospital (GCRC M01 RR16587, U10 HD21397) – Charles R. Bauer, MD; Shahnaz Duara, MD; Ruth Everett-Thomas, RN MSN; Amy Mur Worth, RN.

University of New Mexico Health Sciences Center (GCRC M01 RR997, U10 HD27881) – Lu-Ann Papile, MD; Conra Backstrom Lacy, RN.

University of Tennessee (U10 HD21415) – Sheldon B. Korones, MD; Henrietta S. Bada, MD; Tina Hudson, RN BSN.

University of Texas Southwestern Medical Center at Dallas Parkland Health & Hospital System and Children's Medical Center Dallas (GCRC M01 RR633, U10 HD40689) – Abbot R. Laptook, MD; Walid A. Salhab, MD; Susie Madison, RN.

University of Texas Health Science Center at Houston Medical School, Children's Memorial Hermann Hospital, and Lyndon B. Johnson General Hospital (U10 HD21373) – Jon E. Tyson, MD MPH; Kathleen A. Kennedy, MD MPH; Esther G. Akpa, RN BSN; Patty A. Cluff, RN; Claudia Y. Franco, RN BSN MSN NNP; Anna E. Lis, RN BSN; Georgia E. McDavid, RN.

Wake Forest University Baptist Medical Center, Forsyth Medical Center, and Brenner Children’s Hospital (GCRC M01 RR7122, U10 HD40498) – T. Michael O’Shea, MD MPH; Robert G. Dillard, MD; Lisa K. Washburn, MD; Nancy J. Peters, RN CCRP.

Wayne State University Hutzel Women’s Hospital and Children’s Hospital of Michigan (U10 HD21385) –Geraldine Muran, RN BSN; Rebecca Bara, RN BSN.

Yale University Yale-New Haven Children’s Hospital (GCRC M01 RR6022, U10 HD27871) – Richard A. Ehrenkranz, MD; Patricia Gettner, RN; Monica Konstantino, RN BSN.
